# Supplementary material for: Aripiprazole, but Not Olanzapine, Alters the Response to Oxida-Tive Stress, Reducing the Activation of Mitogen-Activated Protein Kinases (MAPKs) and Promoting Cell Survival in FAO Cells
Source: Preprints.org preprint supplement (doi:10.20944/preprints202407.0129.v1), 2024-07-02
Supplement: Supplementary file 1 [file supplementary]

**
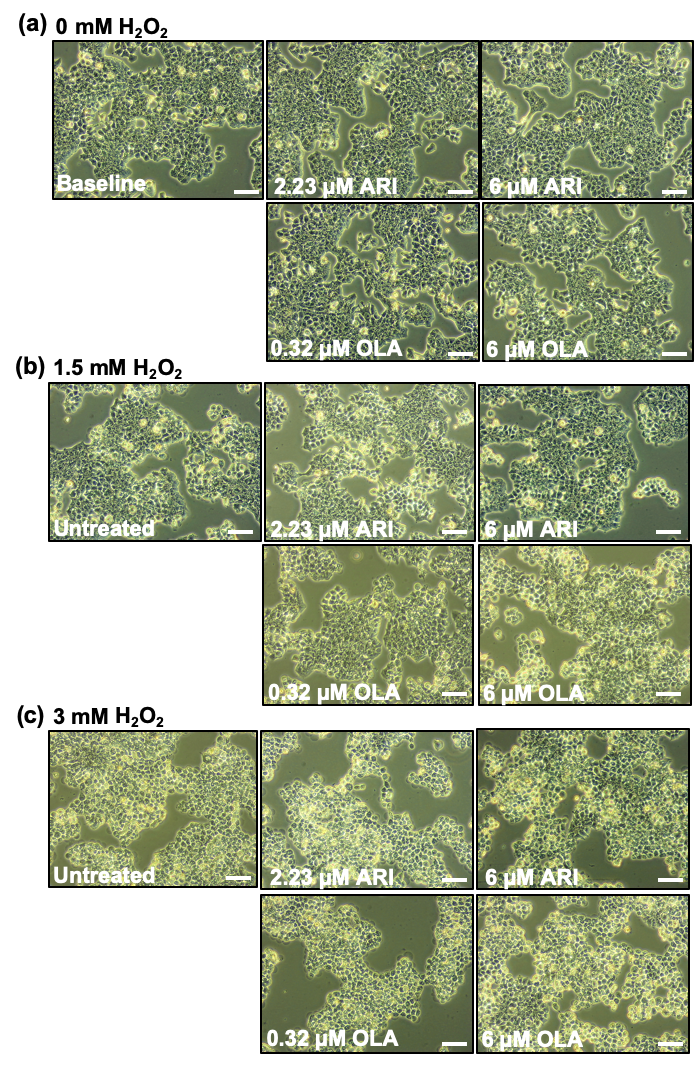
**

**Supplementary Figure 1.** *Images of live Fao cells taken with an inverted microscope.* Images of cells repeatedly treated with ARI (2.23/6 μM) or OLA (0.32/6 μM) and corresponding controls. (**a**) No H2O2; (**b**) 1.5 mM H2O2; (c) 3 mM H2O2. Scale bar = 50 µm.

**
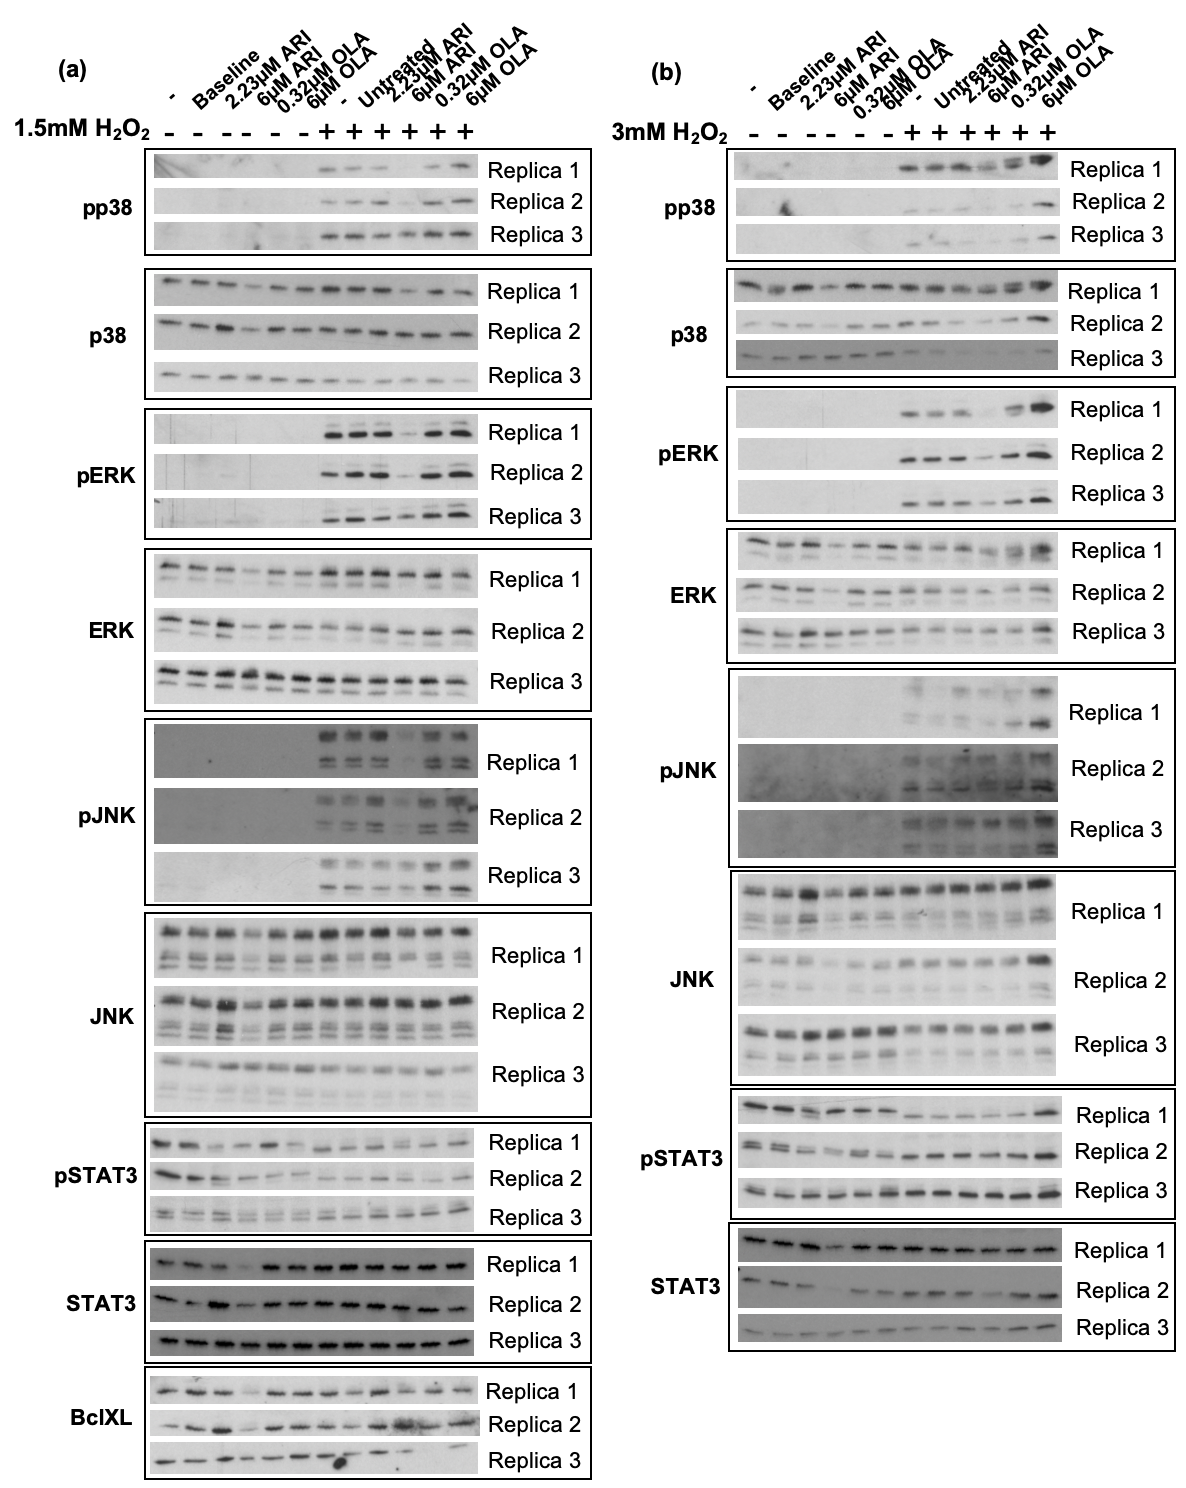
**

**Supplementary Figure 2.** *Compilation of western blot membranes corresponding to Figures 3-6.* Western blot membranes including samples from cells repeatedly treated with ARI (2.23/6 μM) or OLA (0.32/6 μM) and corresponding controls and challenged with 1.5 mM H2O2 (a) or 3 mM H2O2 (b) and non-challenged controls. (-) samples from cells not exposed to anything, and not refered to in the text.

**
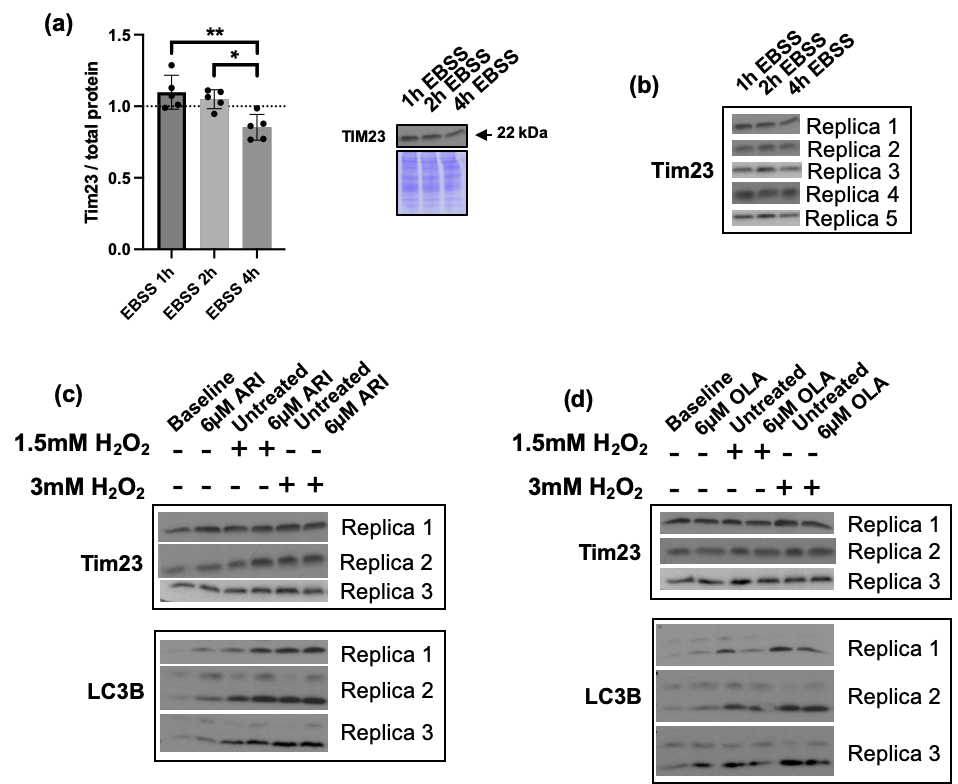
**

**Supplementary Figure 3.** *EBSS treatment and compilation of western blot membranes corresponding to Figure 7*. EBSS treatment for 1h, 2h and 4h (a). Panel include graph and representative western blot and corresponding Coomassie blue dyed gel. Data are presented as mean ± SD and analyzed with One-way ANOVA, followed by a Tukey’s test. **p* ≤ 0.05, ***p* ≤ 0.01; (a): 𝑛 = 5. Western blot membranes including samples from cells treated with EBSS (b) 6 μM ARI (c) or 6μM OLA (d) and challenged with 1.5 mM H2O2 or 3 mM H2O2 and corresponding controls.
